# Supplementary material for: Common Genetic Determinants of Lung Function, Subclinical Atherosclerosis and Risk of Coronary Artery Disease
Source: PubMed Central journal article supplement (PMC4122436; doi:10.1371/journal.pone.0104082), 2014-08-05
Supplement: pone.0104082.s001.pdf [file pone.0104082.s001.pdf]

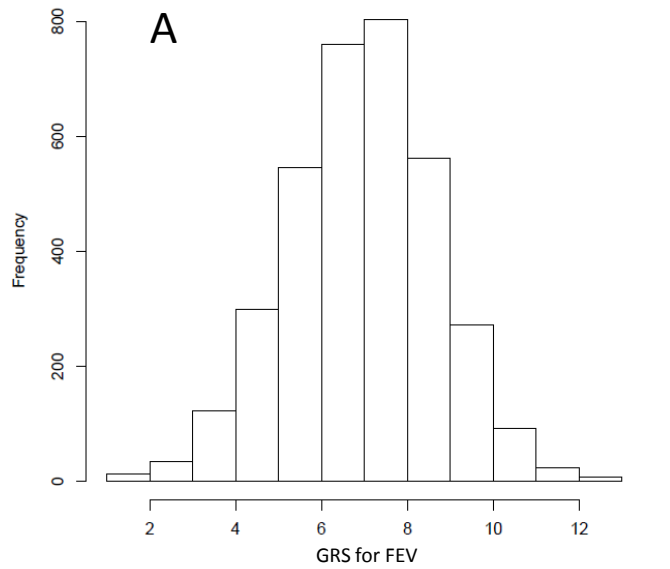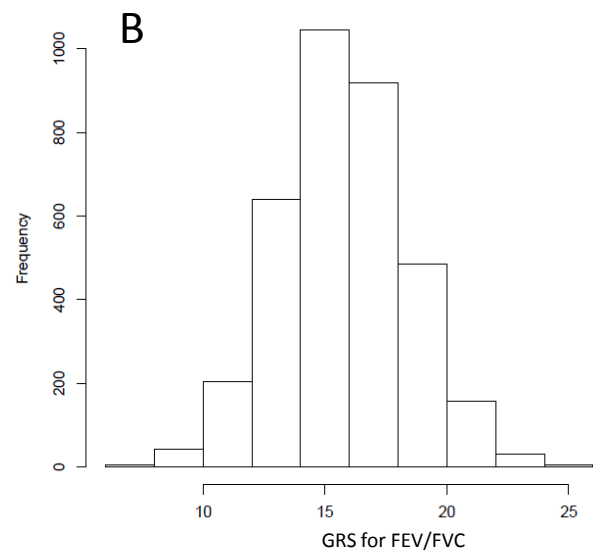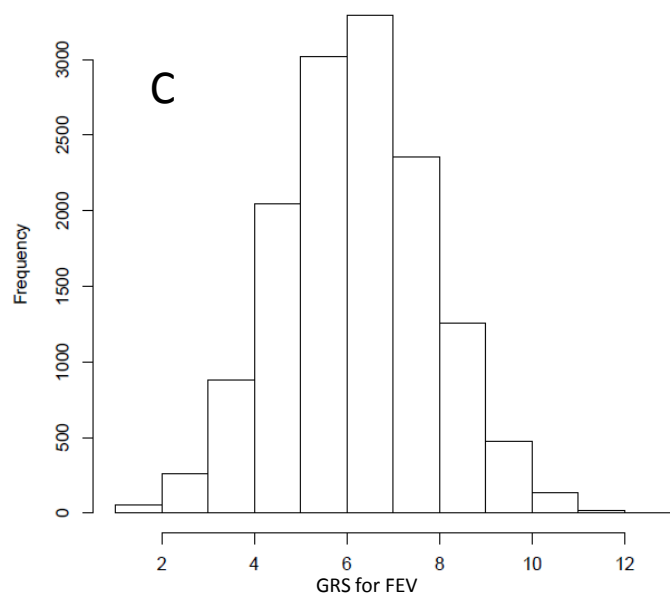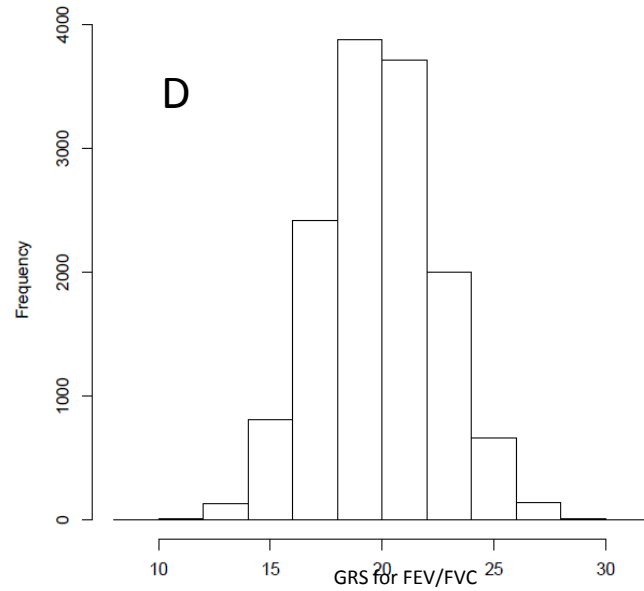

Figure S1: A and B show frequencies of the FEV1 and FEV1/FCV number of risk alleles respectively in IMPROVE. C and D show frequencies of the FEV1 and FEV1/FCV number of risk alleles respectively in PROCARDIS.
